# Supplementary material for: Two new families of the FtsZ-tubulin protein superfamily implicated in membrane remodeling in diverse bacteria and archaea
Source: Springer Nature journal article supplement (doi:10.1186/1745-6150-5-33), 2010-01-01
Supplement: Additional file 6 [file 1745-6150-5-33-s6.docx]

**Uncharacterized putative components of the predicted FtsZl1-centered membrane remodeling system (presented in the Figure 2C)**

| Family | Representative | Comment |
| --- | --- | --- |
| **Archaea** | | |
| A1 | MA2713 | Mixed  and  |
| A2 | MA2710 | Membrane-associated protein |
| GTPase | MA2712 | Membrane associated GTPase |
| **Bacteria** | | |
| vWA | CKL_1663 | Von Willebrand factor type A (vWA) domain containing proteins, often membrane associated. Belong to COG2304. |
| OmpA-like | DR_0536 | Membrane-associated protein with distinct -stranded transmembrane domains. |
| GTPase | cgR_2621 | Diverged GTPase often fused to Zn-binding domains |
| B1 | SGR_3832 | Membrane-associated protein |
| B2 | cgR_2628 | Membrane-associated protein |
| B3 | cgR_2625 | Large membrane-associated protein |
| B4 | cgR_2624 | Large protein with fibronectin type II domain, often associated with S/T protein kinase domain |
| B5 | cgR_2623 | Large protein with low-complexity regions |
| B6 | cgR_2622 | Protein with low-complexity regions |
| B7 | Ava_1849 | Membrane-associated protein |
| B8 | CKL_1665 | Large protein with low-complexity region |
| B9 | CKL_1664 | - |
